# Supplementary material for: Cellular and molecular mechanisms of cigarette smoke-induced lung damage and prevention by vitamin C
Source: Springer Nature journal article supplement (doi:10.1186/1476-9255-5-21), 2008-11-11

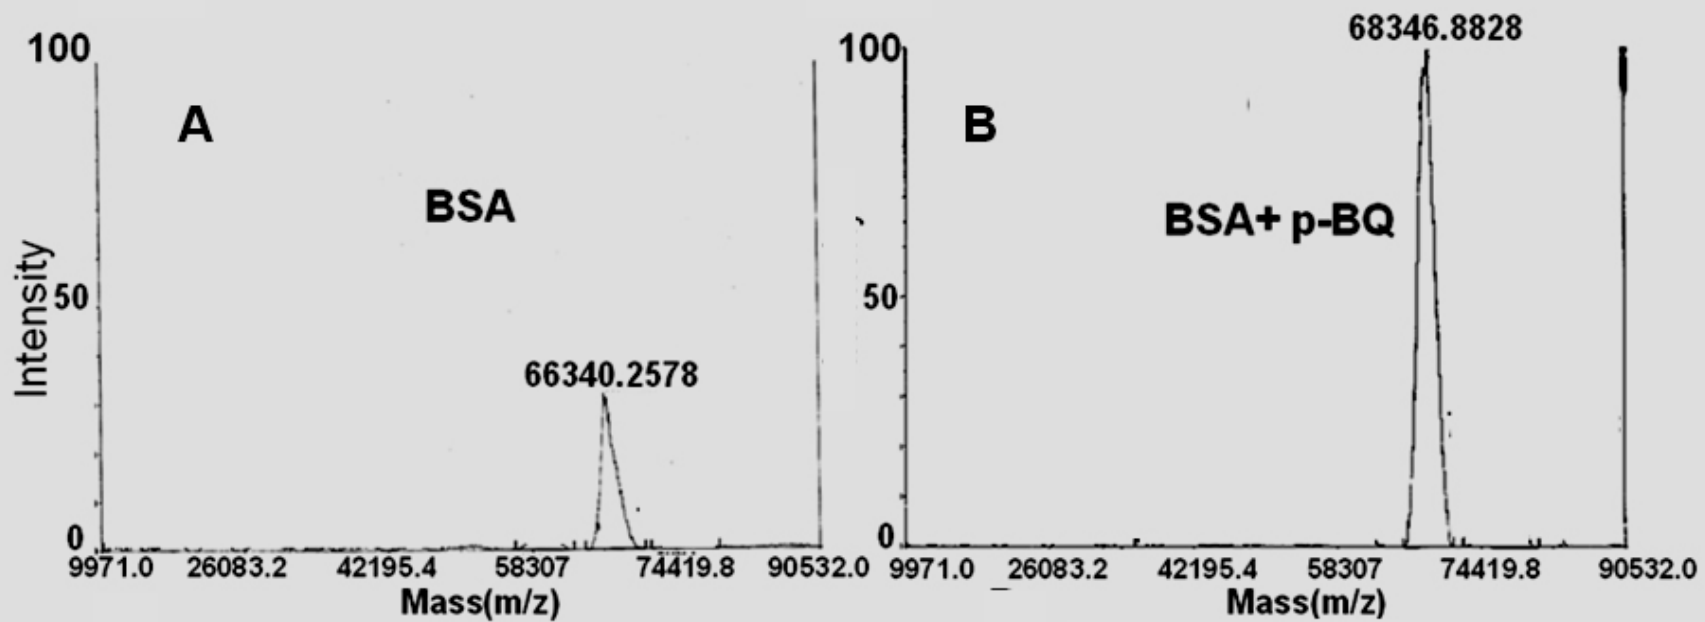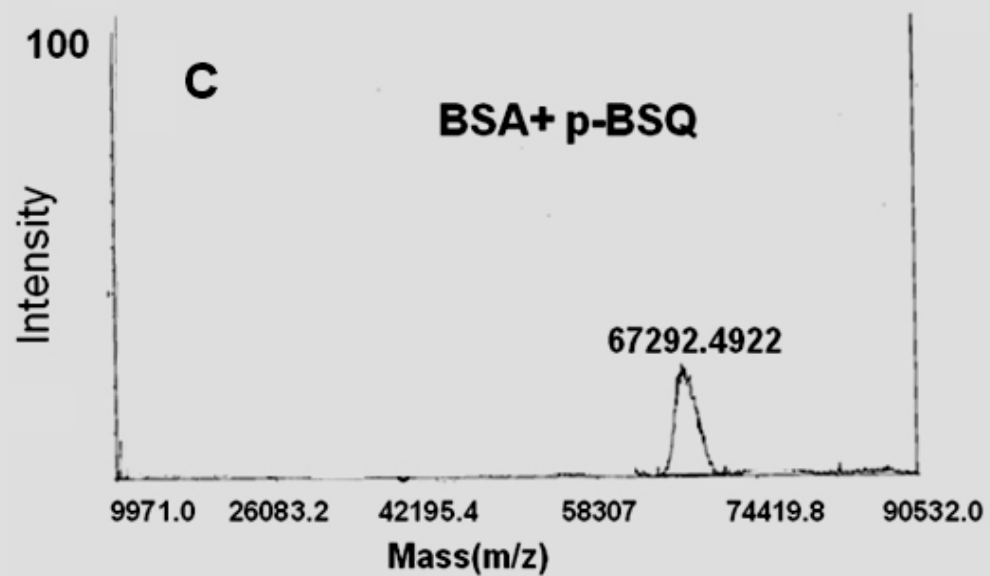

Supplement: 12950_2008_82_MOESM3_ESM.pdf [file 12950_2008_82_MOESM3_ESM.pdf]
