# Supplementary figures and images for: Cellular and molecular mechanisms of cigarette smoke-induced lung damage and prevention by vitamin C
Source: Springer Nature journal article supplement (doi:10.1186/1476-9255-5-21), 2008-11-11

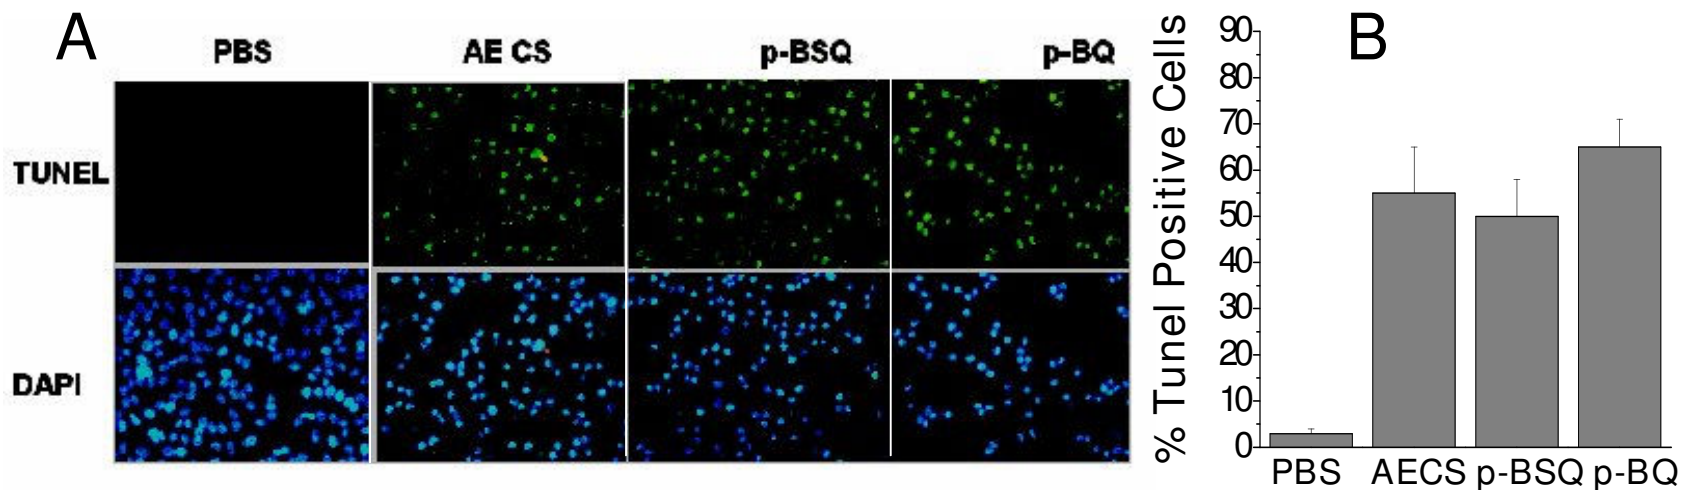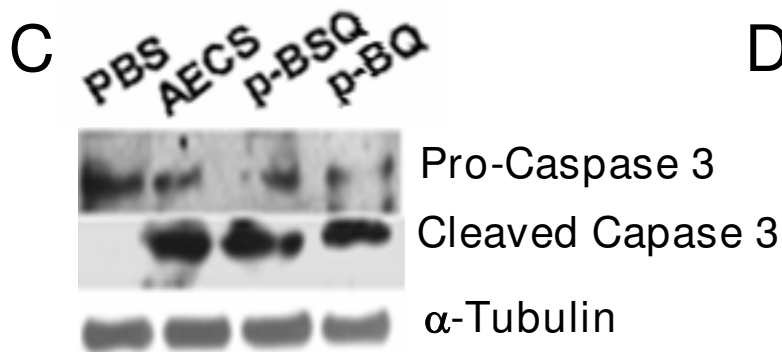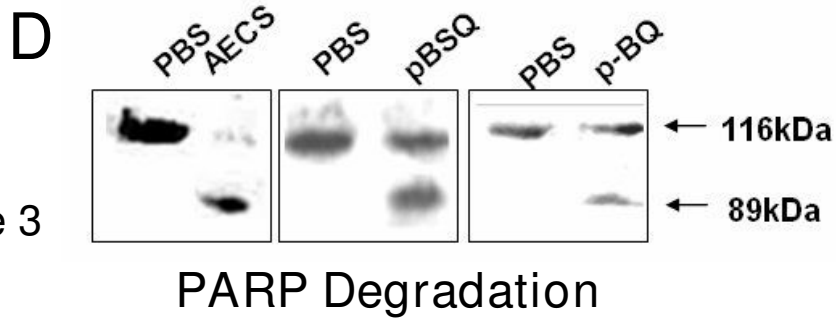

Supplement: 12950_2008_82_MOESM10_ESM.pdf [file 12950_2008_82_MOESM10_ESM.pdf]

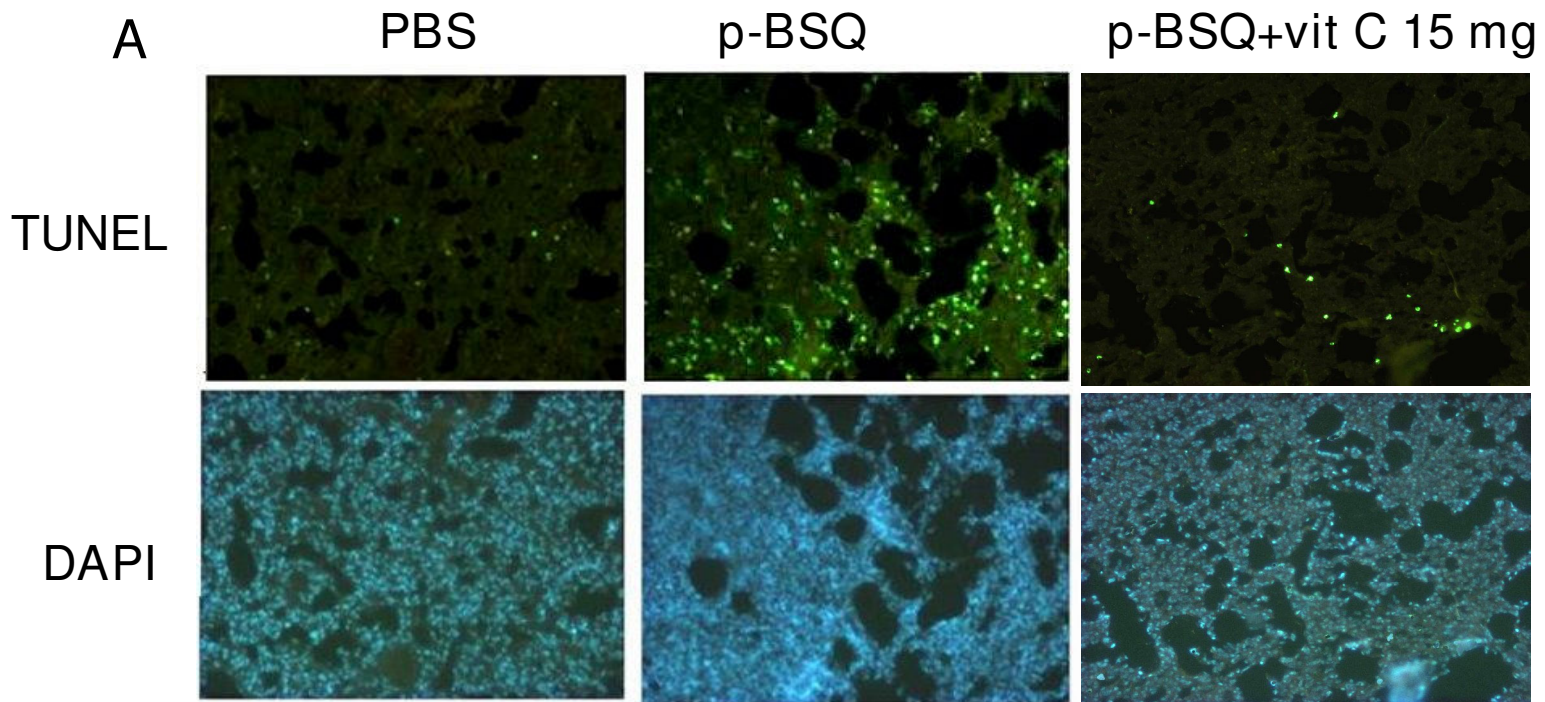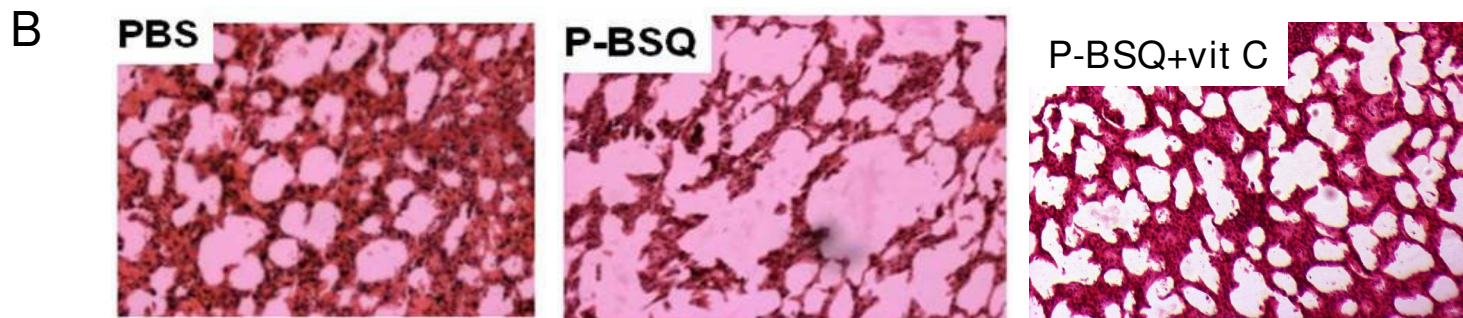

Supplement: 12950_2008_82_MOESM11_ESM.pdf [file 12950_2008_82_MOESM11_ESM.pdf]

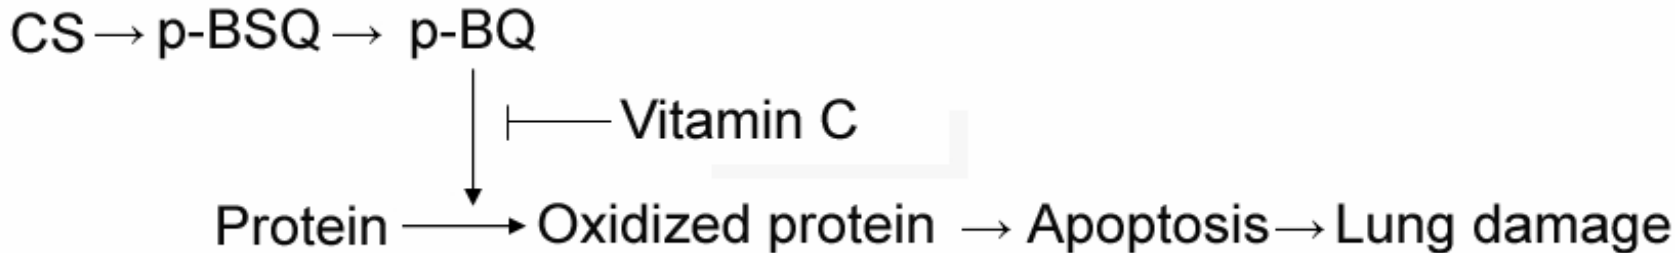

Scheme 1 : Mechanism of CS-induced lung damage and prevention by vitamin C

Supplement: 12950_2008_82_MOESM12_ESM.pdf [file 12950_2008_82_MOESM12_ESM.pdf]

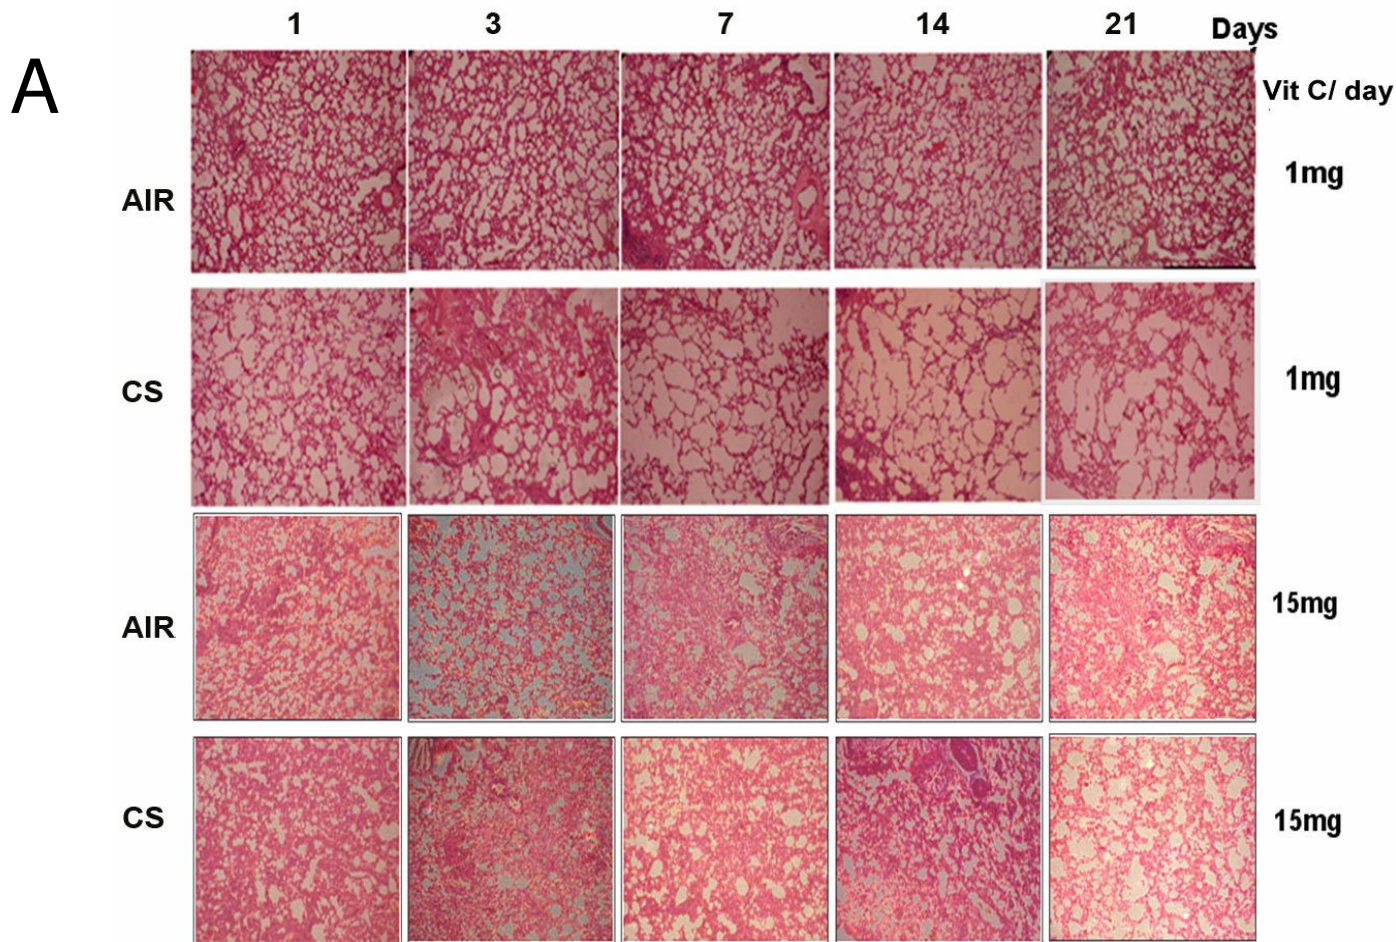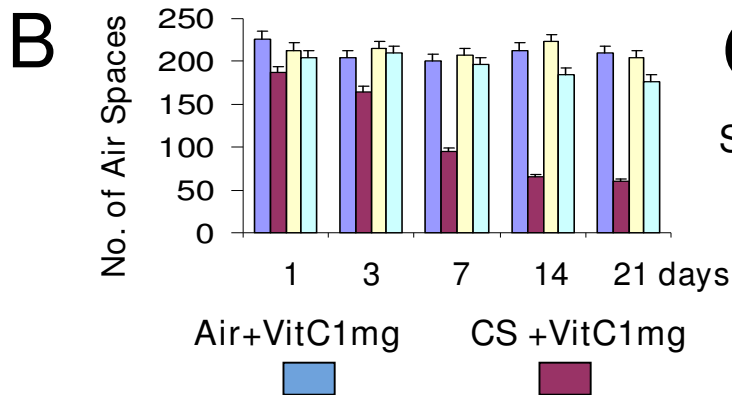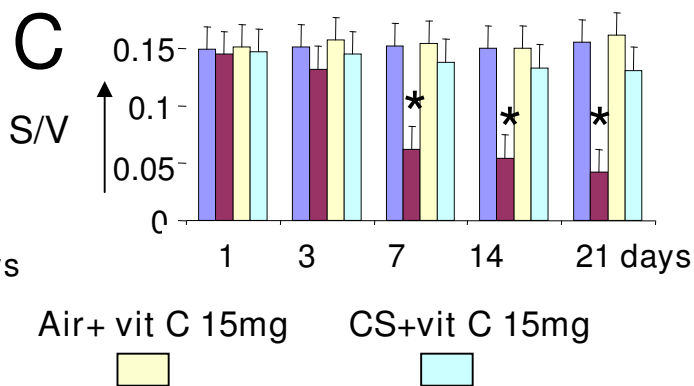

Supplement: 12950_2008_82_MOESM4_ESM.pdf [file 12950_2008_82_MOESM4_ESM.pdf]

**A**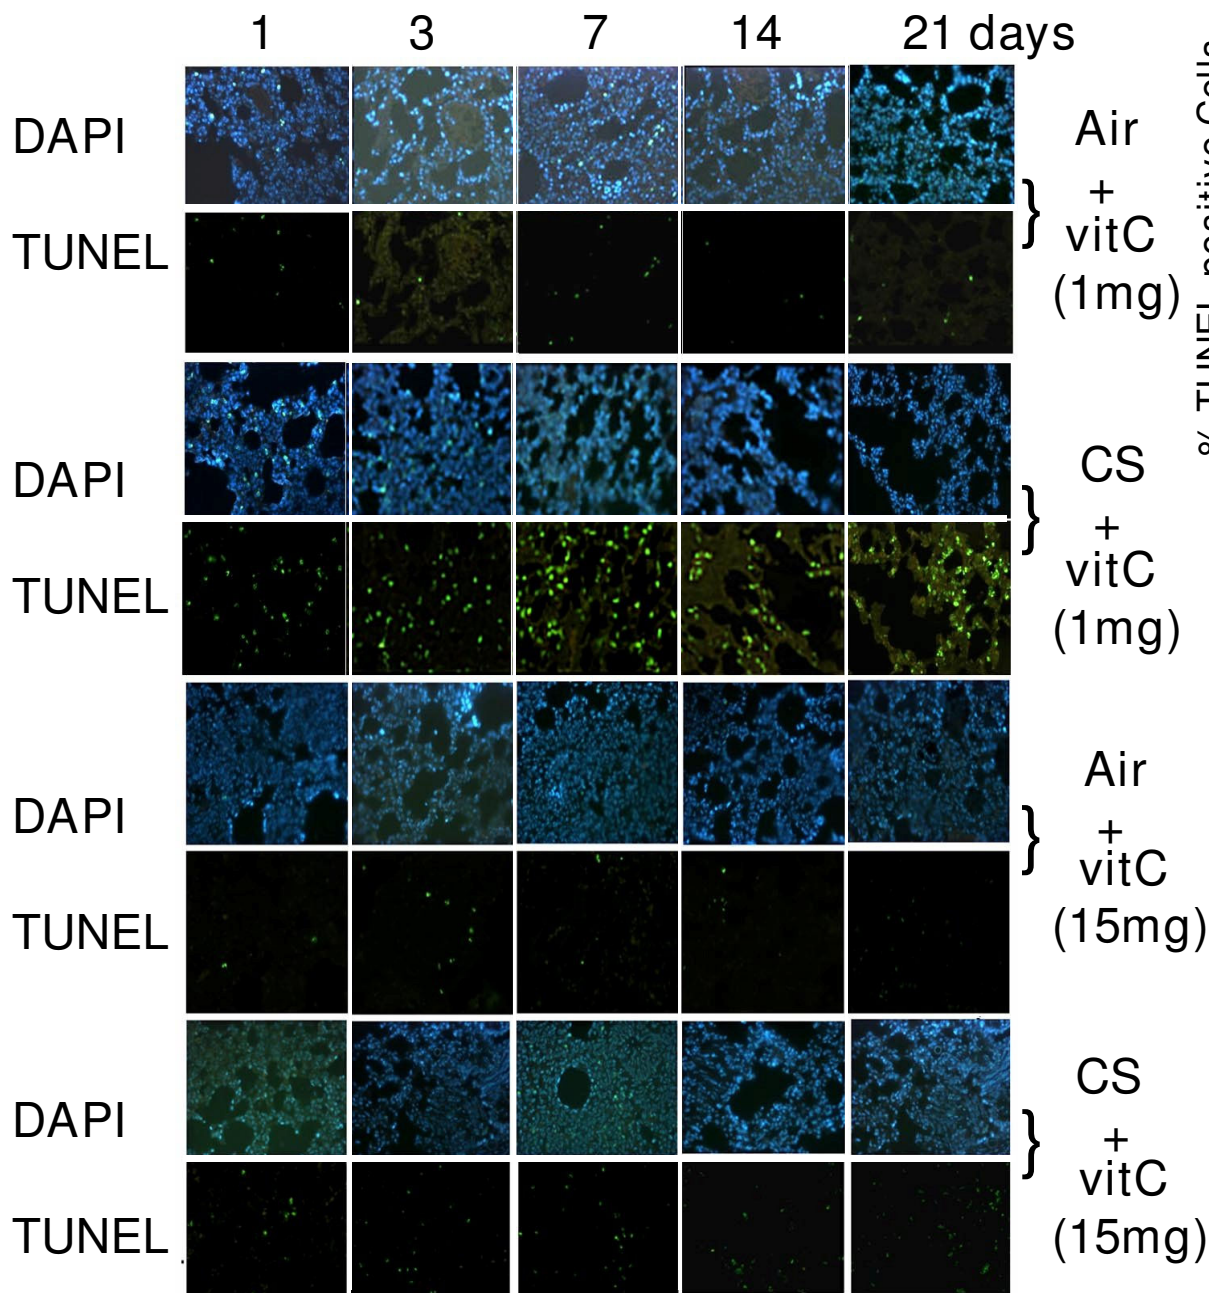**B**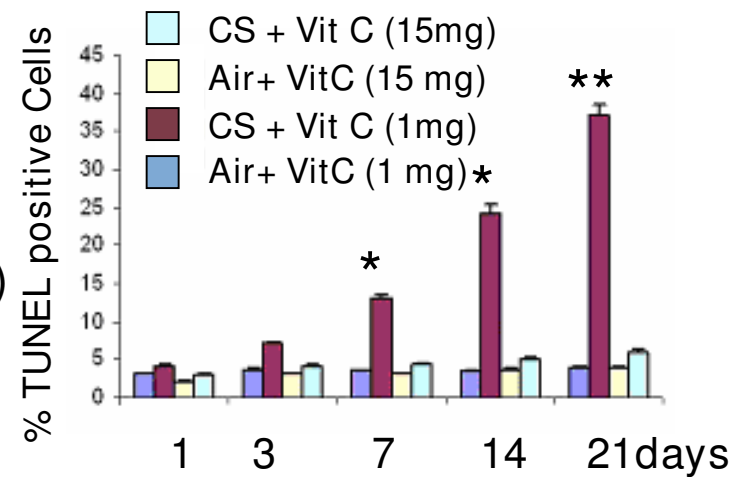

CS + Vit C 1 mg

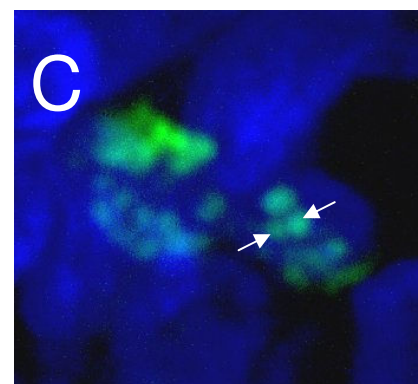

Supplement: 12950_2008_82_MOESM5_ESM.pdf [file 12950_2008_82_MOESM5_ESM.pdf]

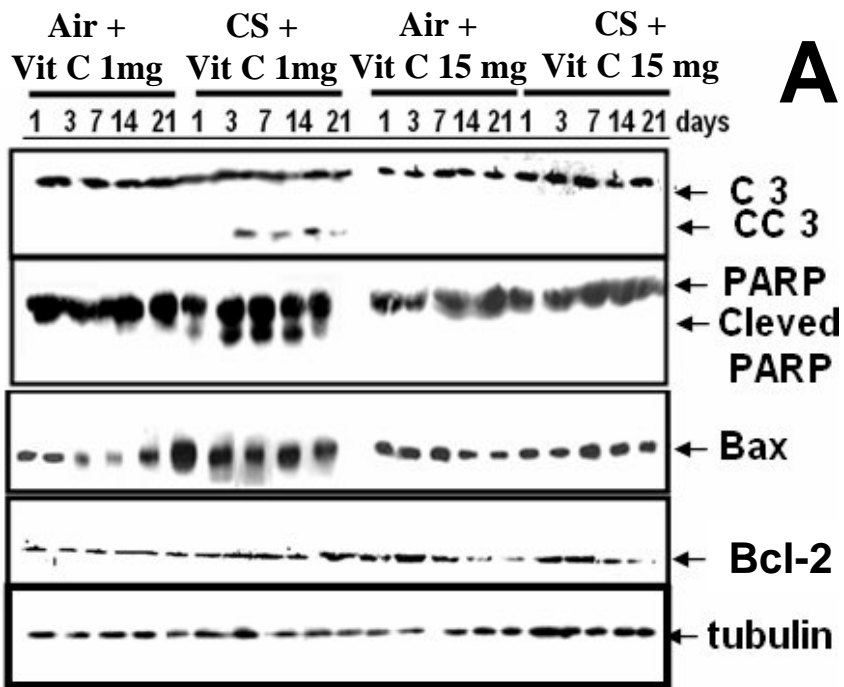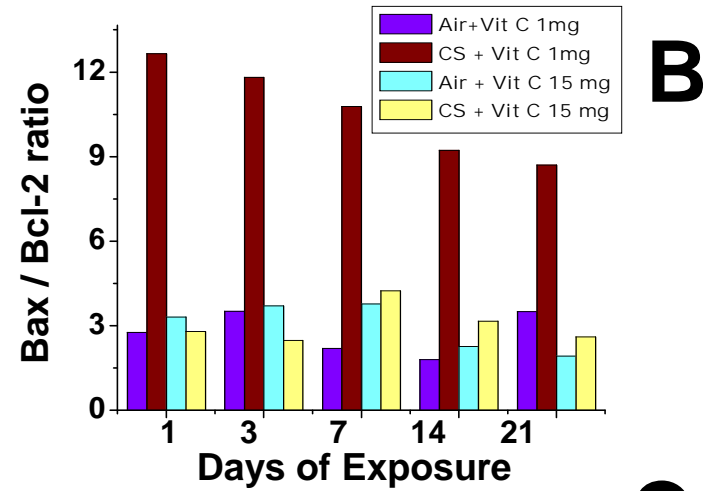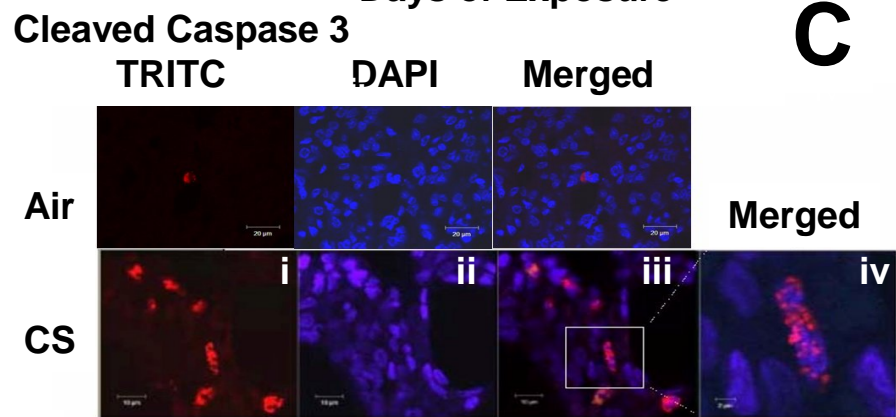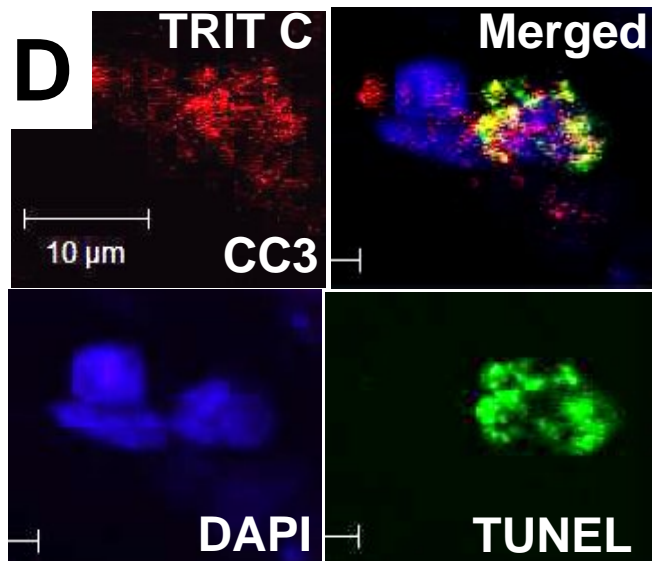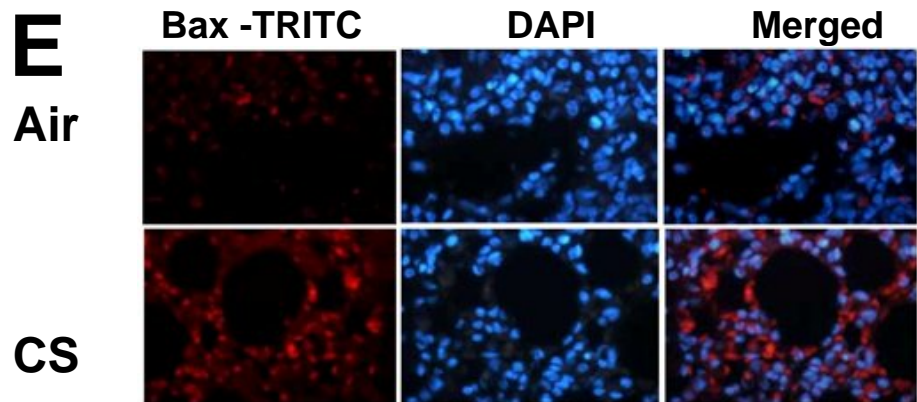

Supplement: 12950_2008_82_MOESM6_ESM.pdf [file 12950_2008_82_MOESM6_ESM.pdf]

No. of CS exposure  
**A** 0 1 2 3

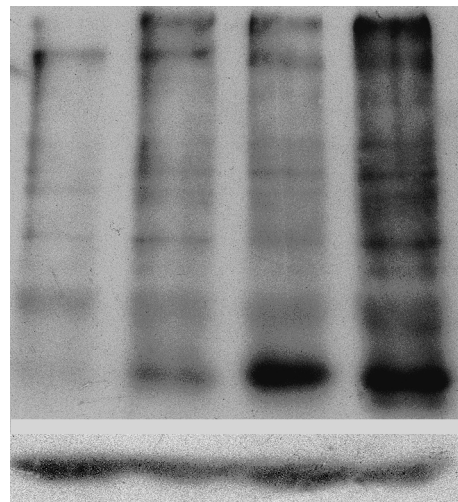

**B**

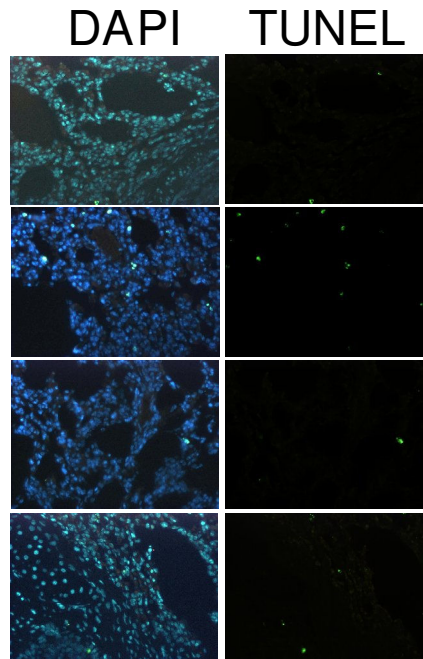

**C**

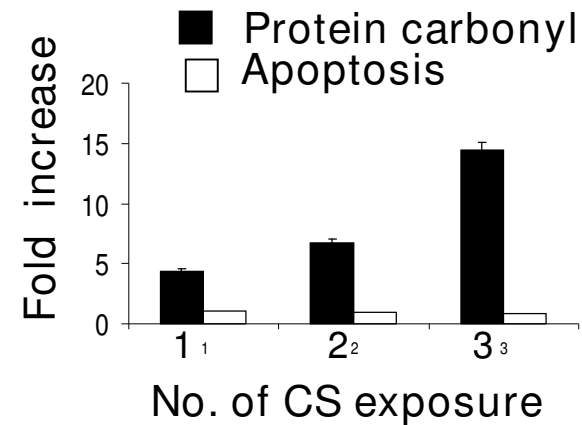

**E**

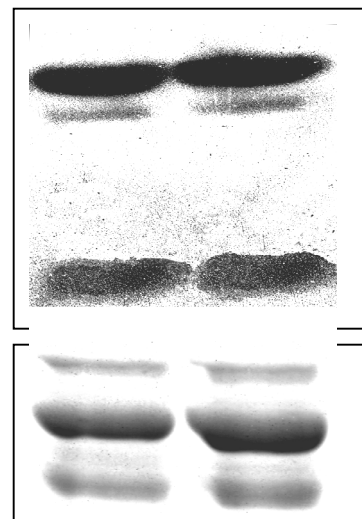

**D**

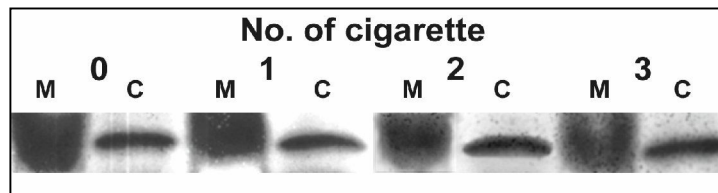

**F**

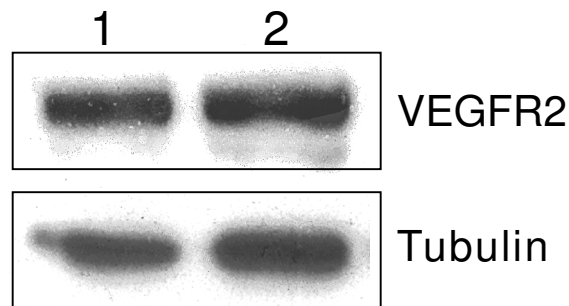

**G**

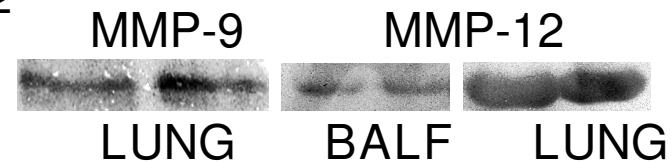

Supplement: 12950_2008_82_MOESM7_ESM.pdf [file 12950_2008_82_MOESM7_ESM.pdf]

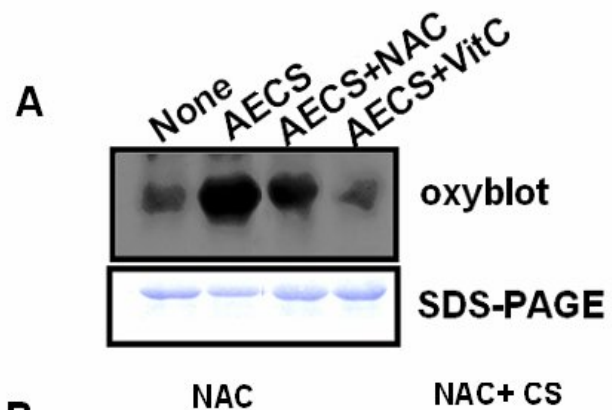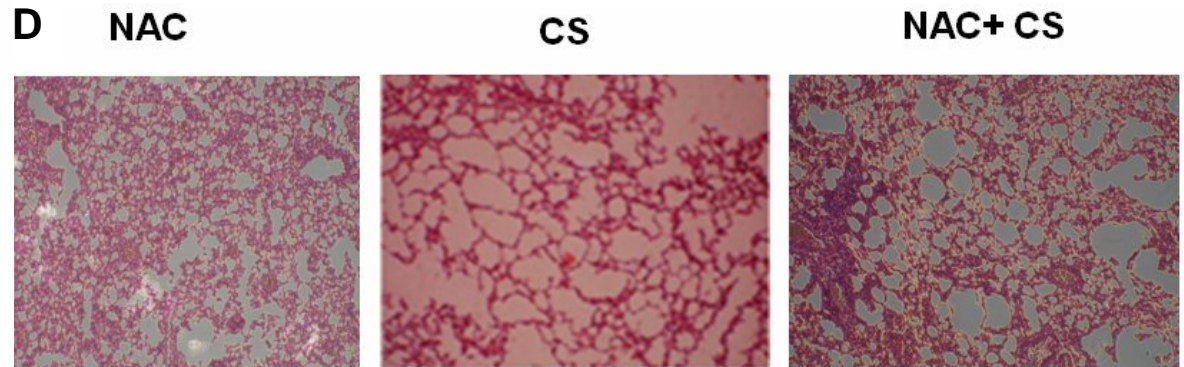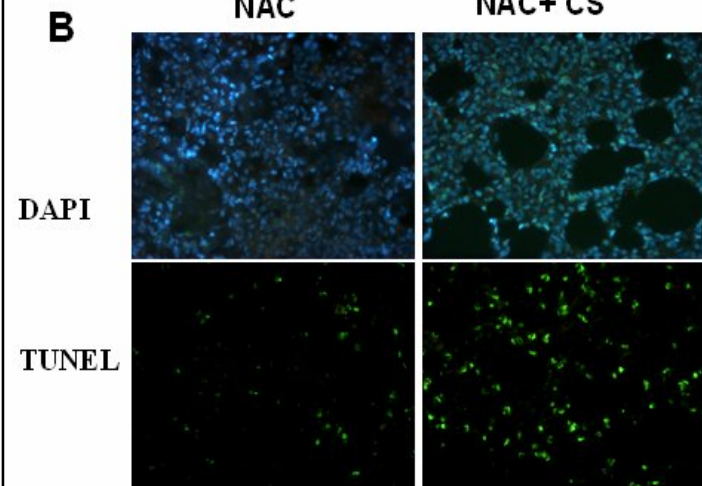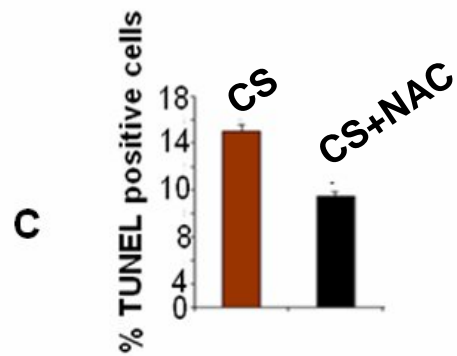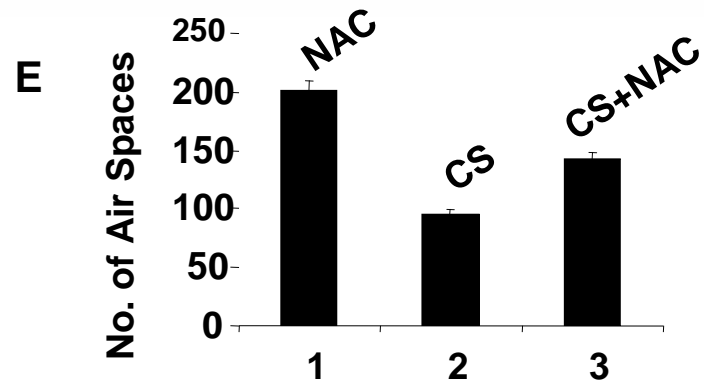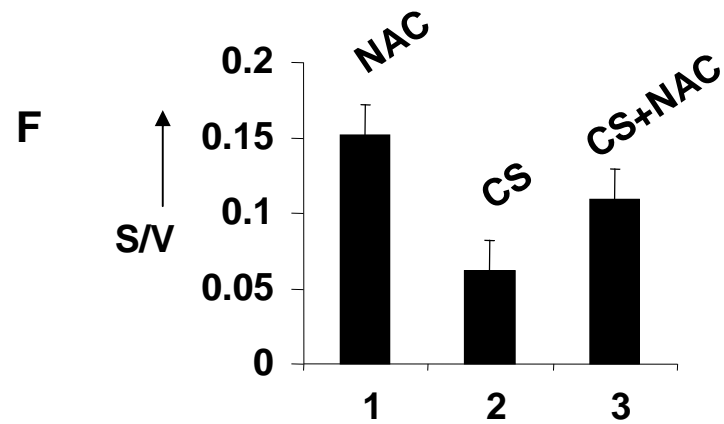

Supplement: 12950_2008_82_MOESM8_ESM.pdf [file 12950_2008_82_MOESM8_ESM.pdf]

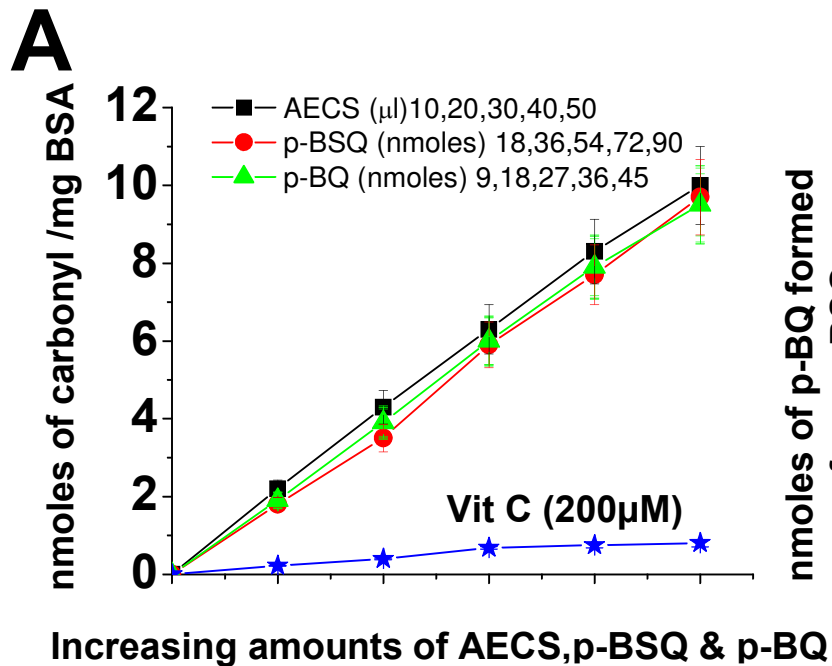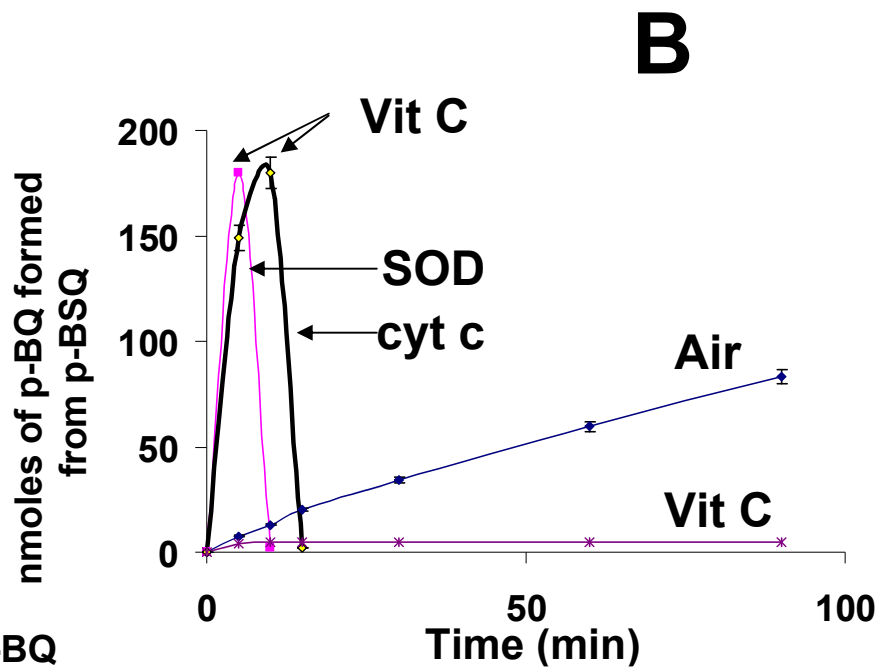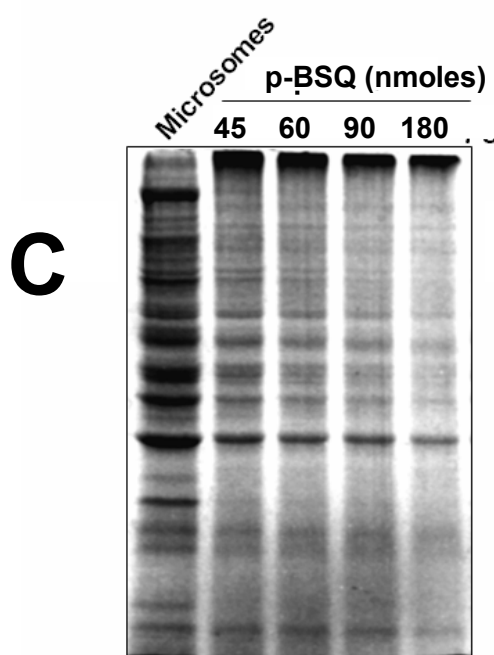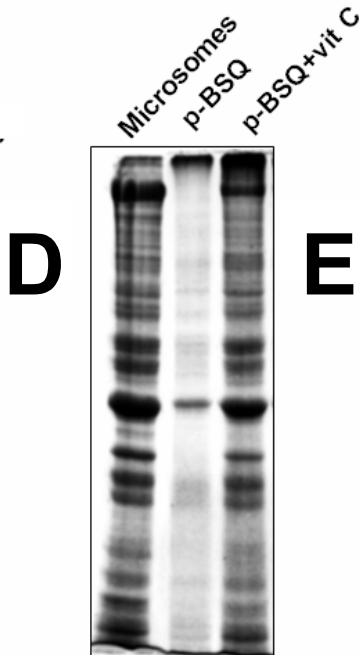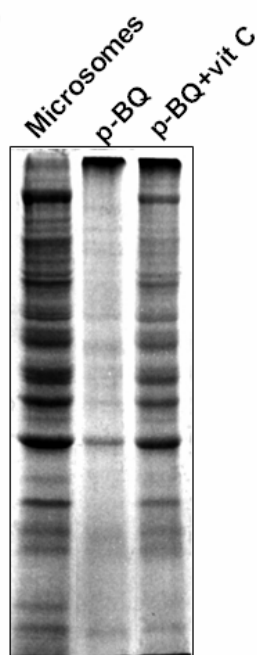

Supplement: 12950_2008_82_MOESM9_ESM.pdf [file 12950_2008_82_MOESM9_ESM.pdf]
